# Supplementary material for: Solubility Determination of c-Met Inhibitor in Solvent Mixtures and Mathematical Modeling to Develop Nanosuspension Formulation
Source: PubMed Central journal article supplement (PMC7828412; doi:10.3390/molecules26020390), 2021-01-13
Supplement: molecules-26-00390-s001.pdf [file molecules-26-00390-s001.pdf]

---

**Solubility determination of c-Met inhibitor in solvent mixtures and mathematical modeling to develop nanosuspension formulation**

Maharjan Ravi<sup>1</sup>, Tripathi Julu<sup>1</sup>, Nam Ah Kim<sup>1,2</sup>, Kyeung Eui Park<sup>2</sup>, Seong Hoon Jeong<sup>1\*</sup>

<sup>1</sup>BK21 FOUR Team and Integrated Research Institute for Drug Development,  
College of Pharmacy, Dongguk University, Gyeonggi 10326, Republic of Korea

<sup>2</sup>R&D Center, ABION Inc., Seoul 08394, Republic of Korea

Authors' addresses

Maharjan Ravi, MS, email: raavii@dgu.ac.kr

Tripathi Julu, MS, email: julutripathi@gmail.com

Kyeung Eui Park, PhD, email: pku1218@abionbio.com

\* To whom correspondence should be addressed.

Nam Ah Kim, PhD, email: namah87@dongguk.edu

Seong Hoon Jeong, PhD, email: [shjeong@dongguk.edu](mailto:shjeong@dongguk.edu)

Tel: (82) 31-961-5225

Submitted to *Molecules*

**Table S1.** Experimental mole fraction solubility of drug in organic solvents over a temperature range of 298.15-318.15 K

| Solvent kept at temperature (K) | $X_{\text{exp}} \cdot 10^{-4}$ | $X_{\text{cal}} \cdot 10^{-4}$ (Modified AM) | $X_{\text{cal}} \cdot 10^{-4}$ (VHM) | $X_{\text{cal}} \cdot 10^{-4}$ (BKM) |
|---------------------------------|--------------------------------|----------------------------------------------|--------------------------------------|--------------------------------------|
|                                 |                                | Water                                        |                                      |                                      |
| 298.15                          | 0.028                          | 0.028                                        | 0.028                                | 0.028                                |
| 303.15                          | 0.033                          | 0.033                                        | 0.033                                | 0.033                                |
| 308.15                          | 0.039                          | 0.038                                        | 0.039                                | 0.039                                |
| 313.15                          | 0.044                          | 0.045                                        | 0.045                                | 0.046                                |
| 318.15                          | 0.054                          | 0.053                                        | 0.053                                | 0.053                                |
|                                 |                                | Methanol                                     |                                      |                                      |
| 298.15                          | 0.386                          | 0.375                                        | 0.398                                | 0.397                                |
| 303.15                          | 0.533                          | 0.499                                        | 0.515                                | 0.514                                |
| 308.15                          | 0.673                          | 0.646                                        | 0.660                                | 0.659                                |
| 313.15                          | 0.826                          | 0.814                                        | 0.840                                | 0.840                                |
| 318.15                          | 1.055                          | 1.000                                        | 1.061                                | 1.066                                |
|                                 |                                | Ethanol                                      |                                      |                                      |
| 298.15                          | 2.171                          | 2.114                                        | 2.172                                | 2.166                                |
| 303.15                          | 2.916                          | 3.074                                        | 3.015                                | 3.015                                |
| 308.15                          | 4.286                          | 4.281                                        | 4.140                                | 4.155                                |
| 313.15                          | 6.058                          | 5.726                                        | 5.629                                | 5.670                                |
| 318.15                          | 7.173                          | 7.373                                        | 7.580                                | 7.670                                |
|                                 |                                | 1-Propanol                                   |                                      |                                      |
| 298.15                          | 7.114                          | 7.115                                        | 7.193                                | 7.199                                |
| 303.15                          | 8.239                          | 8.183                                        | 8.139                                | 8.112                                |
| 308.15                          | 9.083                          | 9.267                                        | 9.172                                | 9.151                                |
| 313.15                          | 10.555                         | 10.344                                       | 10.296                               | 10.308                               |
| 318.15                          | 11.312                         | 11.388                                       | 11.517                               | 11.609                               |
|                                 |                                | 2-Propanol                                   |                                      |                                      |
| 298.15                          | 2.580                          | 2.553                                        | 2.572                                | 2.570                                |
| 303.15                          | 3.245                          | 3.317                                        | 3.303                                | 3.296                                |
| 308.15                          | 4.220                          | 4.239                                        | 4.206                                | 4.198                                |
| 313.15                          | 5.483                          | 5.335                                        | 5.315                                | 5.313                                |
| 318.15                          | 6.524                          | 6.616                                        | 6.667                                | 6.685                                |
|                                 |                                | 1-Butanol                                    |                                      |                                      |
| 298.15                          | 8.278                          | 8.455                                        | 8.269                                | 8.307                                |
| 303.15                          | 9.046                          | 9.152                                        | 8.984                                | 8.980                                |
| 308.15                          | 9.549                          | 9.906                                        | 9.734                                | 8.717                                |
| 313.15                          | 10.660                         | 10.721                                       | 10.521                               | 10.053                               |
| 318.15                          | 11.322                         | 11.602                                       | 11.343                               | 11.427                               |
|                                 |                                | 2-Butanol                                    |                                      |                                      |
| 298.15                          | 4.083                          | 3.984                                        | 4.213                                | 4.200                                |
| 303.15                          | 5.652                          | 5.520                                        | 5.554                                | 5.541                                |
| 308.15                          | 7.434                          | 7.320                                        | 7.255                                | 7.247                                |
| 313.15                          | 9.640                          | 9.316                                        | 9.398                                | 9.408                                |
| 318.15                          | 11.632                         | 11.407                                       | 12.074                               | 12.131                               |
|                                 |                                | Acetonitrile                                 |                                      |                                      |
| 298.15                          | 6.086                          | 5.969                                        | 6.028                                | 6.011                                |
| 303.15                          | 6.312                          | 6.504                                        | 6.520                                | 6.490                                |
| 308.15                          | 7.204                          | 7.032                                        | 7.035                                | 7.013                                |

|      | 313.15 | 7.672  | 7.549         | 7.571  | 7.590  | Table                                      |        |
|------|--------|--------|---------------|--------|--------|--------------------------------------------|--------|
|      | 318.15 | 8.020  | 8.048         | 8.130  | 8.226  |                                            |        |
| S2.  |        |        | Acetone       |        |        | plica-<br>of<br>Fedors'<br>method<br>esti- |        |
|      |        | 9.798  | 9.658         | 9.533  | 9.523  |                                            |        |
|      |        | 10.141 | 10.528        | 10.591 | 10.559 |                                            |        |
|      | Ap-    | 308.15 | 11.788        | 11.589 | 11.726 |                                            | 11.697 |
|      |        | 313.15 | 13.050        | 12.876 | 12.941 |                                            | 12.964 |
|      | 318.15 | 14.269 | 14.428        | 14.237 | 14.373 |                                            |        |
| tion |        |        | Ethyl acetate |        |        |                                            |        |
|      |        | 6.437  | 6.450         | 6.443  | 4.569  |                                            |        |
|      |        | 6.777  | 6.813         | 6.781  | 4.960  |                                            |        |
|      |        | 7.161  | 7.192         | 7.149  | 5.274  |                                            |        |
|      |        | 7.589  | 7.587         | 7.555  | 5.680  |                                            |        |
|      | 318.15 | 7.958  | 7.998         | 8.001  | 6.127  |                                            |        |
| to   |        |        | THP           |        |        |                                            |        |
|      |        | 20.584 | 20.575        | 20.706 | 20.657 |                                            |        |
|      |        | 24.069 | 24.976        | 24.462 | 24.438 |                                            |        |
|      |        | 29.311 | 29.590        | 28.744 | 28.667 |                                            |        |
|      |        | 34.665 | 34.264        | 33.601 | 33.620 |                                            |        |
|      | 318.15 | 37.906 | 38.832        | 39.086 | 39.351 |                                            |        |

mate internal energy, molar volume, and Hildebrand solubility parameter of ABN401.

| Group                        | Group number | $\Delta_{ei}$ ( $kJ\ mol^{-1}$ )         | $\Delta_{vi}$ ( $cm^3\ mol^{-1}$ ) |
|------------------------------|--------------|------------------------------------------|------------------------------------|
| CH <sub>3</sub>              | 2            | $2 \times 4.71 = 9.42$                   | $2 \times 33.5 = 67$               |
| CH <sub>2</sub>              | 8            | $8 \times 4.94 = 39.52$                  | $8 \times 16.1 = 128.8$            |
| -CH=                         | 9            | $9 \times 3.43 = 30.87$                  | $9 \times 13.5 = 121.5$            |
| CH                           | 1            | 3.43                                     | -1                                 |
| C=                           | 8            | $8 \times 4.30 = 34.40$                  | $8 \times -5.5 = -44$              |
| N                            | 5            | $5 \times 4.18 = 20.9$                   | $5 \times -9 = -45$                |
| -N=                          | 7            | $7 \times 11.71 = 81.97$                 | $7 \times 5 = 35$                  |
| O                            | 1            | 3.35                                     | 3.8                                |
| Phenylene (p)                | 1            | 31.92                                    | 52.4                               |
| Conjugated double bonds      | 9            | $9 \times 1.67 = 15.03$                  | $9 \times -2.2 = -19.8$            |
| Ring closure 5 or more atoms | 6            | $6 \times 1.05 = 6.30$                   | $6 \times 16 = 96$                 |
| Total                        |              | 277.11                                   | 394.7                              |
| Solubility parameter         |              | $(277110/394.7)^{1/2} = 26.5\ MPa^{1/2}$ |                                    |

**Table S3.** Solvatochromic parameters ( $\alpha$ ,  $\beta$ , and  $\pi^*$ ) and Hildebrand solubility parameter ( $\delta_H$ ) for solvents.

| Solvents      | $\alpha$ | $\beta$ | $\pi^*$ | $\delta_H$ (MPa <sup>1/2</sup> ) |
|---------------|----------|---------|---------|----------------------------------|
| Water         | 1.17     | 0.47    | 1.09    | 47.82                            |
| Methanol      | 0.98     | 0.66    | 0.60    | 29.61                            |
| Ethanol       | 0.86     | 0.75    | 0.54    | 26.13                            |
| 1-Propanol    | 0.84     | 0.90    | 0.52    | 24.45                            |
| 2-Propanol    | 0.76     | 0.84    | 0.48    | 23.58                            |
| 1-Butanol     | 0.84     | 0.84    | 0.47    | 23.35                            |
| 2-Butanol     | 0.69     | 0.80    | 0.40    | 28.70                            |
| Acetonitrile  | 0.19     | 0.40    | 0.75    | 24.40                            |
| Acetone       | 0.08     | 0.43    | 0.71    | 19.95                            |
| Ethyl acetate | 0.00     | 0.45    | 0.55    | 18.20                            |
| THP           | 0.00     | –       | –       | 22.30                            |

\*Data obtained from the references [S1, S2, and S3]

**Table S4.** Experimental mole fraction solubility ( $X_{\text{exp}} * 10^{-4}$ ) values of ABN401 in THP mixture at different temperatures.

| $x_2$ | 298.15 K | 303.15 K | 308.15 K | 313.15 K | 318.15 K |
|-------|----------|----------|----------|----------|----------|
| 0     | 0.028    | 0.033    | 0.039    | 0.044    | 0.054    |
| 0.1   | 0.105    | 0.117    | 0.134    | 0.146    | 0.168    |
| 0.2   | 0.161    | 0.199    | 0.243    | 0.281    | 0.294    |
| 0.3   | 0.279    | 0.392    | 0.470    | 0.561    | 0.689    |
| 0.4   | 0.796    | 0.812    | 0.948    | 1.341    | 1.925    |
| 0.5   | 1.943    | 2.746    | 3.346    | 4.123    | 4.416    |
| 0.6   | 4.691    | 5.366    | 6.205    | 7.103    | 7.675    |
| 0.7   | 9.605    | 10.787   | 12.009   | 13.075   | 14.558   |
| 0.8   | 14.772   | 16.644   | 19.213   | 23.622   | 27.507   |
| 0.9   | 24.192   | 26.087   | 28.669   | 35.847   | 42.288   |
| 1     | 20.584   | 24.069   | 29.311   | 34.786   | 37.906   |

\*  $x_2$  is mass fraction of THP in TWM in the absence of ABN401

\* Standard uncertainties ,  $u(T) = 0.05$  K

**Table S5.** Activity coefficients ( $\gamma_i$ ) of drug in various TWM mixture at 298.15 to 318.15 K.

| $w_2$ | $\gamma_i$   |              |              |              |              |
|-------|--------------|--------------|--------------|--------------|--------------|
|       | T = 298.15 K | T = 303.15 K | T = 308.15 K | T = 313.15 K | T = 318.15 K |
| 0     | 887.91       | 609.19       | 431.99       | 314.50       | 211.50       |
| 0.1   | 237.99       | 174.55       | 124.77       | 94.99        | 68.33        |
| 0.2   | 156.04       | 102.64       | 68.81        | 49.18        | 39.19        |
| 0.3   | 90.04        | 52.07        | 35.62        | 24.62        | 16.71        |
| 0.4   | 31.51        | 25.12        | 17.64        | 10.31        | 5.98         |
| 0.5   | 12.91        | 7.43         | 5.00         | 3.35         | 2.61         |
| 0.6   | 5.35         | 3.80         | 2.70         | 1.95         | 1.50         |
| 0.7   | 2.61         | 1.89         | 1.39         | 1.06         | 0.79         |
| 0.8   | 1.70         | 1.23         | 0.87         | 0.59         | 0.42         |
| 0.9   | 1.04         | 0.78         | 0.58         | 0.39         | 0.27         |
| 1     | 1.22         | 0.85         | 0.57         | 0.40         | 0.30         |

\*  $w_2$  is mole fraction of THP in TWM in the absence of ABN401

**Table S6.** Thermodynamic parameters of drug dissolution in solvents at the harmonic temperature of 308.15 K.

| Solvents      | $\Delta H^\circ$<br>KJ mol <sup>-1</sup> | $\Delta G^\circ$<br>KJ mol <sup>-1</sup> | $\Delta S^\circ$<br>J.mol <sup>-1</sup> .K <sup>-1</sup> | $R^2$  |
|---------------|------------------------------------------|------------------------------------------|----------------------------------------------------------|--------|
| Water         | 24.92                                    | 31.89                                    | -22.64                                                   | 0.9981 |
| Methanol      | 38.63                                    | 24.65                                    | 45.39                                                    | 0.9986 |
| Ethanol       | 49.24                                    | 19.94                                    | 95.14                                                    | 0.9992 |
| 1-Propanol    | 18.54                                    | 17.91                                    | 2.04                                                     | 0.9974 |
| 2-Propanol    | 37.51                                    | 19.91                                    | 57.16                                                    | 0.9982 |
| 1-Butanol     | 12.45                                    | 17.76                                    | -17.22                                                   | 0.9993 |
| 2-Butanol     | 41.48                                    | 18.51                                    | 74.56                                                    | 0.9961 |
| Acetonitrile  | 11.78                                    | 18.59                                    | -22.10                                                   | 0.9967 |
| Acetone       | 15.80                                    | 17.28                                    | -4.81                                                    | 0.9959 |
| Ethyl acetate | 8.99                                     | 18.54                                    | -31.01                                                   | 0.9983 |
| THP           | 25.03                                    | 14.99                                    | 32.60                                                    | 0.9987 |

\* Standard uncertainties ,  $u(\Delta H^\circ) = 0.14$ ,  $u(\Delta G^\circ) = 0.23$ ,  $u(\Delta S^\circ) = 0.26$

**Table S7.** Apparent thermodynamic parameters for dissolution behaviour of drug in TWM mixture.

| $w_2$ | $\Delta H^\circ$<br>KJ mol <sup>-1</sup> | $\Delta G^\circ$<br>KJ mol <sup>-1</sup> | $\Delta S^\circ$<br>J.mol <sup>-1</sup> .K <sup>-1</sup> | $R^2$  |
|-------|------------------------------------------|------------------------------------------|----------------------------------------------------------|--------|
| 0     | 41.94                                    | 31.90                                    | 32.59                                                    | 0.9976 |
| 0.1   | 40.48                                    | 28.70                                    | 38.24                                                    | 0.9971 |
| 0.2   | 38.30                                    | 27.26                                    | 35.84                                                    | 0.9978 |
| 0.3   | 29.62                                    | 25.47                                    | 13.47                                                    | 0.9975 |
| 0.4   | 29.00                                    | 23.22                                    | 18.76                                                    | 0.9981 |
| 0.5   | 26.61                                    | 20.51                                    | 19.80                                                    | 0.9970 |
| 0.6   | 25.03                                    | 18.88                                    | 19.96                                                    | 0.9969 |
| 0.7   | 24.92                                    | 17.19                                    | 25.09                                                    | 0.9968 |
| 0.8   | 23.58                                    | 15.84                                    | 25.12                                                    | 0.9976 |
| 0.9   | 21.52                                    | 14.73                                    | 22.04                                                    | 0.9981 |
| 1     | 19.07                                    | 14.99                                    | 13.24                                                    | 0.9988 |

$w_2$  is mole fraction of THP in TWM in the absence of ABN401.

\* Standard uncertainties ,  $u(\Delta H^\circ) = 0.15$ ,  $u(\Delta G^\circ) = 0.29$ ,  $u(\Delta S^\circ) = 0.09$



**Table S8.** Stability results for ABN401 nanosuspension formulation.

|    | Formulations                                                                       | Concentration<br>(%, w/v) | Particle size<br>(z-average, nm) |        |        | Particle size<br>( $d_{90}$ , nm) |        |        | Zeta potential<br>(mV) |
|----|------------------------------------------------------------------------------------|---------------------------|----------------------------------|--------|--------|-----------------------------------|--------|--------|------------------------|
|    |                                                                                    |                           | Initial                          | 3 days | 7 days | Initial                           | 3 days | 7 days |                        |
| F1 | Kollidon <sup>®</sup> VA / Kollidon <sup>®</sup><br>K12 / Lutrol <sup>®</sup> F127 | 1.0/0.5/1.0               | 54.9                             | 156.3  | 278.2  | 186.4                             | 531.3  | 568.2  | -35.26                 |
| F2 | Kollidon <sup>®</sup> VA / Kollidon <sup>®</sup><br>K12 / HP $\beta$ CD            | 1.0/0.5/1.0               | 43.0                             | 84.9   | 105.7  | 183.1                             | 420.8  | 476.2  | -43.07                 |
| F3 | Kollidon <sup>®</sup> VA / Kollidon <sup>®</sup><br>K12 / PEG 6000                 | 1.0/0.5/1.0               | 53.1                             | 255.2  | 396.1  | 168.3                             | 505.3  | 531.6  | -34.57                 |
| F4 | Kollidon <sup>®</sup> VA / Kollidon <sup>®</sup><br>K12/ SLS                       | 1.0/0.5/0.1               | 120.1                            | 184.7  | 218.3  | 226.1                             | 929.4  | 1086.0 | -40.19                 |

**Table S9.** Materials used in the experiments

| Name          | Molecular formulae                                | Molar mass (g mol <sup>-1</sup> ) | Mass fraction purity (%) <sup>a</sup> | Analysis method   | Source                              |
|---------------|---------------------------------------------------|-----------------------------------|---------------------------------------|-------------------|-------------------------------------|
| ABN401        | C <sub>29</sub> H <sub>34</sub> N <sub>12</sub> O | 566.66                            | 99.9                                  | HPLC <sup>b</sup> | Abion Inc.                          |
| Methanol      | CH <sub>4</sub> O                                 | 32.04                             | 99.9                                  | GC <sup>c</sup>   | Avantor Performance Materials       |
| Ethanol       | C <sub>2</sub> H <sub>6</sub> O                   | 46.07                             | 99.9                                  | GC                | Avantor Performance Materials       |
| 1-Propanol    | C <sub>3</sub> H <sub>8</sub> O                   | 60.10                             | 99.5                                  | GC                | Daejung Chemical & Metals Co., Ltd. |
| 2-Propanol    | C <sub>3</sub> H <sub>8</sub> O                   | 60.10                             | 99.7                                  | GC                | Daejung Chemical & Metals Co., Ltd. |
| 1-Butanol     | C <sub>4</sub> H <sub>10</sub> O                  | 74.12                             | 99.5                                  | GC                | Junsei Chemical Co., Ltd.           |
| 2-Butanol     | C <sub>4</sub> H <sub>10</sub> O                  | 74.12                             | 99.5                                  | GC                | Daejung Chemical & Metals Co., Ltd. |
| Acetonitrile  | C <sub>2</sub> H <sub>3</sub> N                   | 41.05                             | 99.9                                  | GC                | Avantor Performance Materials       |
| Acetone       | C <sub>3</sub> H <sub>6</sub> O                   | 58.08                             | 99.8                                  | GC                | Daejung Chemical & Metals Co., Ltd. |
| Ethyl acetate | C <sub>4</sub> H <sub>8</sub> O <sub>2</sub>      | 46.07                             | 99.5                                  | GC                | Junsei Chemical Co., Ltd.           |
| THP           | C <sub>6</sub> H <sub>14</sub> O <sub>3</sub>     | 134.17                            | 99.4                                  | GC                | Gattefosse Co.,                     |

<sup>a</sup> Mass fraction purity values were provided by the suppliers.

<sup>b</sup> High performance liquid chromatography

<sup>c</sup> Gas chromatography

**Table S10.** Particle size of nanosuspension prepared using different drug concentrations in THP and various ratios of solvent/anti-solvent using Kollidon<sup>®</sup> VA64/ Kollidon<sup>®</sup> K12/ HP $\beta$ CD.

| Mole fraction in THP | Ratio of solvent/ Anti-solvent | Mole fraction in TWM mixture | Particle size (z-average, nm) | Particle size (d <sub>90</sub> , nm) |
|----------------------|--------------------------------|------------------------------|-------------------------------|--------------------------------------|
| 0.04                 | 1/4                            | 0.2                          | 68.6                          | 174.9                                |
| 0.04                 | 1/9                            | 0.1                          | 43.0                          | 183.1                                |
| 0.08                 | 1/4                            | 0.2                          | 70.0                          | 194.1                                |
| 0.08                 | 1/9                            | 0.1                          | 57.5                          | 192.2                                |

**Table S11.** Particle size of nanosuspension prepared using various polymers and stabilizer combination.

|    | Formulations                                 | Concentration<br>(%, w/v) | Particle size<br>(z-average, nm) | Particle size<br>(d <sub>90</sub> , nm) |
|----|----------------------------------------------|---------------------------|----------------------------------|-----------------------------------------|
| F1 | Kollidon® VA/ Kollidon® K12/ Lutrol®<br>F127 | 1.0/0.5/1.0               | 54.9                             | 186.4                                   |
| F2 | Kollidon® VA/ Kollidon® K12/<br>HPβCD        | 1.0/0.5/1.0               | 43.0                             | 183.1                                   |
| F3 | Kollidon® VA/ Kollidon® K12/ PEG<br>6000     | 1.0/0.5/1.0               | 53.1                             | 168.3                                   |
| F4 | Kollidon® VA/ Kollidon® K12/ SLS             | 1.0/0.5/0.1               | 120.1                            | 226.1                                   |

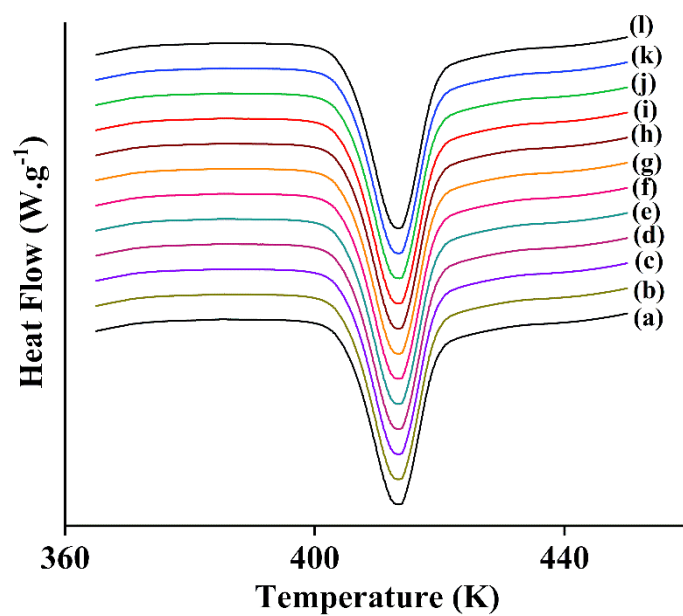

**Figure S1.** DSC thermograms of drug alone (a), drug - recovered from water (b), methanol (c), ethanol (d), 1-propanol (e), 2-propanol (f), 1-butanol (g), 2-butanol (h), acetonitrile (i), acetone (j), ethyl acetate (k), and THP (l).

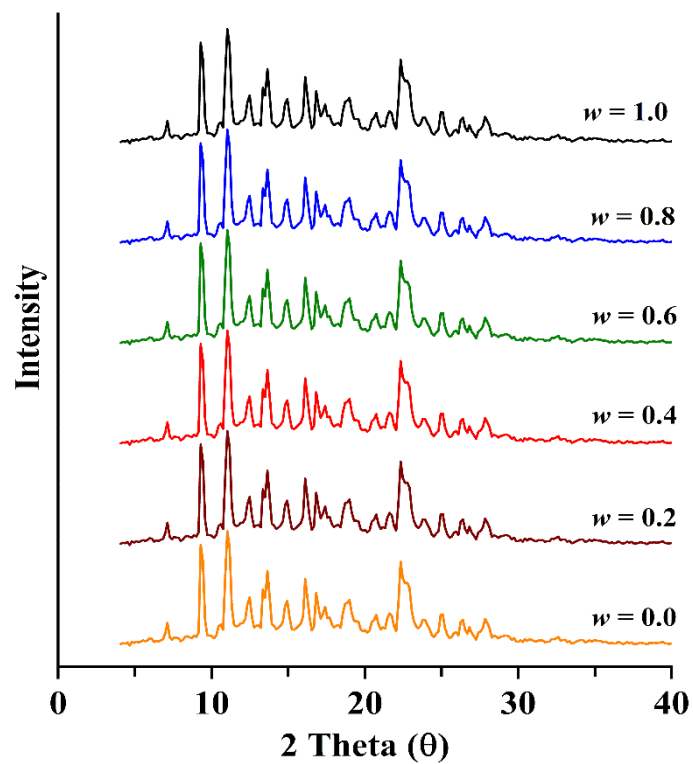

**Figure S2.** PXRD patterns of drug before and after solubility experiments in THP ( $w$ ) + water ( $1-w$ ) mixed solvents.

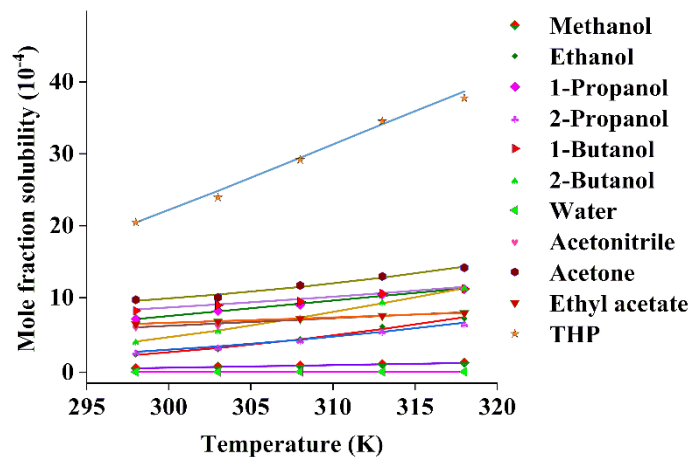

**Figure S3.** Experimental and calculated mole fraction solubility of ABN401 on various organic solvents based on modified AM equation. Solid lines denote the calculated solubility.

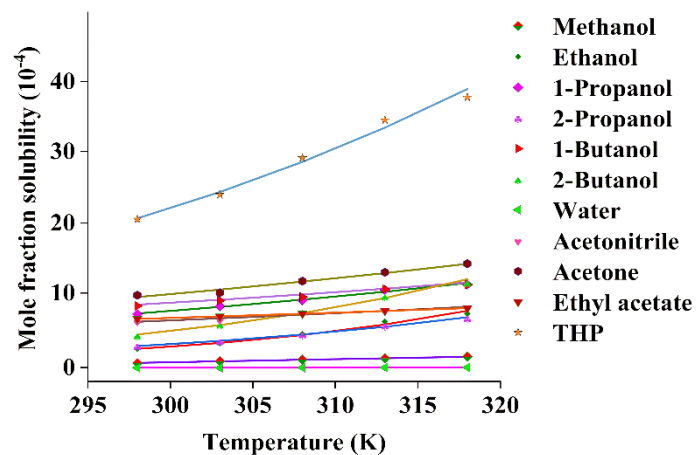

**Figure S4.** Experimental and calculated mole fraction solubility of ABN401 on various organic solvents based on ideal model. Solid lines denote the calculated solubility.



---

## Reference

- S1. Lee, S.-K.; Sim, W.-Y.; Ha, E.-S.; Park, H.; Kim, J.-S.; Jeong, J.-S.; Kim, M.-S. Solubility of bisacodyl in fourteen mono solvents and N-methyl-2-pyrrolidone+ water mixed solvents at different temperatures, and its application for nanosuspension formation using liquid antisolvent precipitation. *J. Mol. Liq.* **2020**, 113264. <https://doi.org/10.1016/j.molliq.2020.113264>
- S2. Jessop, P. G.; Jessop, D. A.; Fu, D.; Phan, L. J. G. C. Solvatochromic parameters for solvents of interest in green chemistry. **2012**, 14, 1245-1259.
- S3. Marcus, Y. The properties of organic liquids that are relevant to their use as solvating solvents. *Chem. Soc. Rev.* **1993**, 22, 409-416.
